# Supplementary material
Source: MDPI journal article supplement (https://www.mdpi.com/2071-1050/13/21/11965)
Supplement: s1 [file s1 › sustainability-1417142-supplementary.pdf]

## Supplementary Materials

**Table S1.** Serial numbers explanation from the Figure 6.

| Ref No. | Author                                                                                         | Year | Title                                                                                                                                                     | Conference                           | Journal                                                         |
|---------|------------------------------------------------------------------------------------------------|------|-----------------------------------------------------------------------------------------------------------------------------------------------------------|--------------------------------------|-----------------------------------------------------------------|
| 1       | Peter E.D. Lovea,*,<br>Jingyang Zhoua, Jane<br>Matthewsb, Matthew<br>Lavenderb, Troy<br>Morsec | 2018 | Managing rail<br>infrastructure for a digital<br>future: Future-proofing of<br>asset information                                                          |                                      | Transportation Research                                         |
| 2       | Kayis MA Abuzayana,<br>Andrew Whytea, Joyce<br>Bella                                           | 2014 | Asset-management<br>framework(s) for<br>infrastructure facilities in<br>adverse (post-<br>conflict/disaster-<br>zone/high-alert) conditions               | Procedia<br>Economics and<br>Finance |                                                                 |
| 3       | Paul Brousab, Paulien<br>Herdera, Marijn<br>Janssena                                           | 2015 | Towards Modelling Data<br>Infrastructures in the Asset<br>Management<br>Domain                                                                            | Procedia<br>Computer Science         |                                                                 |
| 4       | Paul Brousa, Paulien<br>Herdera, Marijn<br>Janssena                                            | 2016 | Governing Asset<br>Management Data<br>Infrastructures                                                                                                     | Procedia<br>Computer Science         |                                                                 |
| 5       | Silvana Bruno,<br>Mariella De Fino,<br>Fabio Fatiguso                                          | 2018 | Historic Building<br>Information Modelling:<br>performance assessment<br>for<br>diagnosis-aided<br>information modelling and<br>management                |                                      | Automation in Construction                                      |
| 6       | Hasan Burak Cavka,<br>Sheryl Staub-French,<br>Erik A. Poirier                                  | 2017 | Developing owner<br>information requirements<br>for BIM-enabled project<br>delivery and asset<br>management                                               |                                      | Automation in Construction                                      |
| 7       | Aaron Costina, Alireza<br>Adibfara, Hanjin Hub,<br>Stuart S. Chenc                             | 2018 | Building Information<br>Modeling (BIM) for<br>transportation<br>infrastructure –Literature<br>review, applications,<br>challenges, and<br>recommendations |                                      | Automation in Construction                                      |
| 8       | Blaine Fanning;<br>Caroline M. Clevenger                                                       | 2014 | Implementing BIM on<br>Infrastructure:<br>Comparison of<br>Two Bridge Construction<br>Projects                                                            |                                      | Practice Periodical on Structural<br>Design<br>and Construction |
| 9       | Eissa Fathallaa,<br>Yasushi Tanakab,<br>Koichi Maekawaa                                        | 2018 | Remaining fatigue life<br>assessment of in-service<br>road bridge decks based<br>upon artificial neural<br>networks                                       |                                      | Engineering Structures                                          |
| 10      | Paula Fraga-Lamas *,<br>Tiago M. Fernández-<br>Caramés and Luis<br>Castedo                     | 2017 | Towards the Internet of<br>Smart Trains: A Review<br>on Industrial IoT-<br>Connected Railways                                                             |                                      | Sensors                                                         |

| Ref No. | Author                                                                                                                                                                                                                                                               | Year | Title                                                                                                                                                            | Conference                          | Journal                                            |
|---------|----------------------------------------------------------------------------------------------------------------------------------------------------------------------------------------------------------------------------------------------------------------------|------|------------------------------------------------------------------------------------------------------------------------------------------------------------------|-------------------------------------|----------------------------------------------------|
| 11      | Clemente Fuggini a,*,<br>Andrea Manfreda a,<br>Juan Jesús Álvarez<br>Andrés b, Livia Pardi<br>c, Ralph Holst d,<br>Dionysios A Bournas<br>e, Gian Marco Revel f,<br>Paolo Chiariotti f,<br>Jos Llamas g,<br>Giampiero Gatti h,<br>Milan Dvorak i,<br>Giacomo Mariani | 2016 | Towards a comprehensive<br>asset integrity<br>management (AIM)<br>approach for European<br>infrastructures                                                       |                                     | Transportation Research Procedia                   |
| 12      | R.V. Hari Ginardia,*,<br>Wawan Gunawanb,<br>Septiawan Rosetya<br>Wardanaa                                                                                                                                                                                            | 2017 | WebGIS for Asset<br>Management of Land and<br>Building of Madiun<br>City Government                                                                              | Procedia<br>Computer Science        |                                                    |
| 13      | Isidro Durazo-<br>Cardenas*, Andrew<br>Starr, Christopher J.<br>Turner1, Ashutosh<br>Tiwari2,<br>Leigh Kirkwood,<br>Maurizio Bevilacqua,<br>Antonios Tsourdos,<br>Essam Shehab,<br>Paul Baguley, Yuchun<br>Xu3, Christos<br>Emmanouilidis                            | 2018 | An autonomous system for<br>maintenance scheduling<br>data-rich<br>complex infrastructure:<br>Fusing the railways’<br>condition, planning<br>and cost☆           |                                     | Transportation Research                            |
| 14      | Abdou Karim Jallowa,<br>Peter Demianb,<br>Chimay J. Anumbac,<br>Andrew N. Baldwinb                                                                                                                                                                                   | 2017 | An enterprise architecture<br>framework for electronic<br>requirements<br>information management                                                                 |                                     | International Journal of Information<br>Management |
| 15      | Joseph M. Giglio, John<br>H. Friar, William F.<br>Crittenden *                                                                                                                                                                                                       | 2018 | Integrating lifecycle asset<br>management in<br>the public sector                                                                                                |                                     | Business Horizons                                  |
| 16      | Yasanur Kayikci                                                                                                                                                                                                                                                      | 2018 | Sustainability impact of<br>digitization in logistics                                                                                                            | Procedia<br>Manufacturing           |                                                    |
| 17      | Florian Kellnera,<br>Andreas Ottoa,<br>Christian Brabändera                                                                                                                                                                                                          | 2017 | Bringing infrastructure<br>into pricing in road freight<br>transportation –<br>A measuring concept<br>based on navigation<br>service data                        | Transportation<br>Research Procedia |                                                    |
| 18      | Tuyen Le, H. David<br>Jeong                                                                                                                                                                                                                                          | 2016 | Interlinking life-cycle data<br>spaces to support<br>decisionmaking in<br>highway<br>asset management                                                            |                                     | Automation in Construction                         |
| 19      | Janet Leea,*, Gregory<br>Fisherb                                                                                                                                                                                                                                     | 2004 | Infrastructure assets<br>disclosure in Australian<br>public<br>sector annual reports                                                                             |                                     | Accounting Forum                                   |
| 20      | Pin-Chan Lee, Yiheng<br>Wang, Tzu-Ping Lo*,<br>Danbing Long                                                                                                                                                                                                          | 2018 | An integrated system<br>framework of building<br>information modelling and<br>geographical information<br>system for utility tunnel<br>maintenance<br>management |                                     | Tunnelling and Underground Space<br>Technology     |

| Ref No. | Author                                                                                               | Year | Title                                                                                                                                            | Conference                                | Journal                                      |
|---------|------------------------------------------------------------------------------------------------------|------|--------------------------------------------------------------------------------------------------------------------------------------------------|-------------------------------------------|----------------------------------------------|
| 21      | Pekka Levićakangas,<br>Seong Mok Paik,<br>Sungkon Moon                                               | 2017 | Keeping up with the pace<br>of digitization: The case of<br>the Australian<br>construction industry                                              |                                           | Technology in Society                        |
| 22      | Peter E.D. Love a,†,<br>Dominic Ahiaga-<br>Dagbui b, Morten<br>Welde c, James Odeck                  | 2017 | Light rail transit cost<br>performance:<br>Opportunities for<br>futureproofing                                                                   |                                           | Transportation Research                      |
| 23      | Peter E.D. Love a,*,<br>Ian Simpson b,<br>Andrew Hill b, Craig<br>Standing                           | 2013 | From justification to<br>evaluation: Building<br>information modeling for<br>asset owners                                                        |                                           | Automation in Construction                   |
| 24      | Peter E.D. Love a,c,<br>Jingyang Zhou a,<br>Chun-pong Sing a,<br>Jeong Tai Kim b                     | 2013 | Documentation errors in<br>instrumentation and<br>electrical systems: Toward<br>productivity improvement<br>using System Information<br>Modeling |                                           | Automation in Construction                   |
| 25      | Peter E.D. Love a , *,<br>Jingyang Zhou a , Jane<br>Matthews b , Harbin<br>Luo c                     | 2016 | Systems information<br>modelling: Enabling<br>digital asset management                                                                           |                                           | Advances in Engineering Software             |
| 26      | Peter E.D. Love a,†,<br>Jingyang Zhou a,<br>David J. Edwards b,<br>Zahir Irani c, Chun-<br>Pong Sing | 2017 | Off the rails: The cost<br>performance of<br>infrastructure rail projects                                                                        |                                           | Transportation Research                      |
| 27      | Mahmoud R. Halfawy,<br>Dana J. Vanier, and<br>Thomas M. Froese                                       | 2006 | Standard data models for<br>interoperability of<br>municipal infrastructure<br>asset management<br>systems                                       |                                           | Can. J. Civ. Eng.                            |
| 28      | Marco Macchi*, Irene<br>Roda*, Elisa Negri*,<br>Luca Fumagalli*                                      | 2018 | Exploring the role of<br>Digital Twin for Asset<br>Lifecycle Management                                                                          | IFAC<br>PapersOnLine                      |                                              |
| 29      | Mária Trojanová                                                                                      | 2014 | Asset Management as<br>Integral Part of Road<br>Economy                                                                                          | Procedia<br>Engineering                   |                                              |
| 30      | S. Thomas Ng1; Frank<br>J. Xu2; Yifan Yang3;<br>Hongyang Li4; and<br>Junjie Li5                      | 2018 | A Social Networking<br>Enabled Crowdsourcing<br>System for Integrated<br>Infrastructure Asset<br>Management                                      | Construction<br>Research<br>Congress 2018 |                                              |
| 31      | E.A. Pärn a,*, D.J.<br>Edwards a, M.C.P.<br>Sing b                                                   | 2017 | The building information<br>modelling trajectory in<br>facilities management:<br>A review                                                        |                                           | Automation in Construction                   |
| 32      | Sanyapong<br>Petchrompo, Ajith<br>Kumar Parlikad                                                     | 2019 | A review of asset<br>management literature on<br>multi-asset systems                                                                             |                                           | Reliability Engineering and System<br>Safety |
| 33      | A. Sánchez-<br>Rodríguez,*, B.<br>Riveirob, M. Soilánb,<br>L.M. González-<br>deSantosa               | 2018 | Automated detection and<br>decomposition of railway<br>tunnels from Mobile<br>Laser Scanning Datasets                                            |                                           | Automation in Construction                   |
| 34      | Rafael Sacksa, Amir<br>Kedarb, André<br>Borrmannc, Ling<br>Mad,*, Ioannis                            | 2018 | SeeBridge as next<br>generation bridge<br>inspection: Overview,<br>Information                                                                   |                                           | Automation in Construction                   |

| Ref No. | Author                                                                                                                                   | Year | Title                                                                                                                                                                              | Conference                                                    | Journal                                         |
|---------|------------------------------------------------------------------------------------------------------------------------------------------|------|------------------------------------------------------------------------------------------------------------------------------------------------------------------------------------|---------------------------------------------------------------|-------------------------------------------------|
|         | Brilakise, Philipp<br>Hüthwohle,<br>Simon Daumc, Uri<br>Kattela, Raz Yosefa,<br>Thomas Liebichf,<br>Burcu Esen Barutcu,<br>Sergej Muhicf |      | Delivery Manual and<br>Model View Definition                                                                                                                                       |                                                               |                                                 |
| 35      | Bharathwaj Sankarana,<br>Guillermo Nevetb,<br>William J. O'Briena,*,<br>Paul M. Goodrumb,<br>Joshua Johnsonb                             | 2018 | Civil Integrated<br>Management: Empirical<br>study of digital practices<br>in<br>highway project delivery<br>and asset management                                                  |                                                               | Automation in Construction                      |
| 36      | Stefania C.<br>Radopoulou a, Ioannis<br>Brilakis                                                                                         | 2016 | Improving road asset<br>condition monitoring                                                                                                                                       | Transportation<br>Research Procedia                           |                                                 |
| 37      | Jennifer Whyte *,<br>Angelos Stasis, Carmel<br>Lindkvist                                                                                 | 2016 | Managing change in the<br>delivery of complex<br>projects: Configuration<br>management, asset<br>information and 'big data                                                         |                                                               | International Journal of Project<br>Management  |
| 38      | Yifan Yanga, S.<br>Thomas Nga,*, Frank<br>J. Xua, Martin<br>Skitmoreb                                                                    | 2018 | Towards sustainable and<br>resilient high density cities<br>through better<br>integration of<br>infrastructure networks                                                            |                                                               | Sustainable Cities and Society                  |
| 39      | Panayioti C. Yianni a,<br>Luis C. Neves a,<br>Dovile Rama a, John<br>D. Andrews a,†,<br>Robert Dean                                      | 2016 | Incorporating local<br>environmental factors into<br>railway bridge asset<br>management                                                                                            |                                                               | Engineering Structures                          |
| 40      | Zeeshan Aziz, Zainab<br>Riaz<br>Muhammad Arslan                                                                                          | 2017 | Leveraging BIM and Big<br>Data to<br>deliver well maintained<br>highways                                                                                                           |                                                               | Facilities                                      |
| 41      | WenjuanZhang a,<br>WenbinWang                                                                                                            | 2014 | Cost modelling in<br>maintenance strategy<br>optimisation for<br>infrastructure<br>assets with limited data                                                                        | Reliability Engineering and System Safety                     |                                                 |
| 42      | Osama Abudayyeh,<br>P.E., and Hussien T.<br>Al-Battaineh                                                                                 | 2003 | As-Built Information<br>Model for Bridge<br>Maintenance                                                                                                                            |                                                               | Journal of Computing in Civil<br>Engineering    |
| 43      | Najaf Ali, Stuart S.<br>Chen, Rohit Srikonda,<br>and Hanjin Hu                                                                           | 2014 | Development of Concrete<br>Bridge Data<br>Schema for<br>Interoperability                                                                                                           |                                                               | Journal of the Transportation Research<br>Board |
| 44      | Julian Amann and<br>André Borrmann                                                                                                       | 2016 | Embedding Procedural<br>Knowledge into Building<br>Information Models: The<br>IFC Procedural Language<br>and Its<br>Application for Flexible<br>Transition Curve<br>Representation |                                                               | Journal of Computing in Civil<br>Engineering    |
| 45      | Julian Amann,<br>Dominic Singer, André<br>Borrmann                                                                                       | 2015 | Extension of the upcoming<br>IFC alignment standard<br>with cross sections for<br>road design                                                                                      | Conference: Proc.<br>of the<br>International<br>Conference on |                                                 |

| Ref No. | Author                                                                                                                                                                                                                                                                                                                                                                                          | Year | Title                                                                                                | Conference                                                                                        | Journal                                             |
|---------|-------------------------------------------------------------------------------------------------------------------------------------------------------------------------------------------------------------------------------------------------------------------------------------------------------------------------------------------------------------------------------------------------|------|------------------------------------------------------------------------------------------------------|---------------------------------------------------------------------------------------------------|-----------------------------------------------------|
|         |                                                                                                                                                                                                                                                                                                                                                                                                 |      |                                                                                                      | Civil and Building Engineering Informatics 2015                                                   |                                                     |
| 46      | J. Bein                                                                                                                                                                                                                                                                                                                                                                                         | 2011 | Modelling of structure geometry in Bridge Management Systems                                         |                                                                                                   | Archives of civil and mechanical engineering        |
| 47      | Fernando G. Bañuelos Blanco, Haibo Chen                                                                                                                                                                                                                                                                                                                                                         | 2014 | The Implementation of Building Information Modelling in the United Kingdom by the Transport Industry | Procedia - Social and Behavioral Sciences                                                         |                                                     |
| 48      | A. Borrmann and J. Jubierre                                                                                                                                                                                                                                                                                                                                                                     | 2013 | A multi-scale tunnel product model providing coherent geometry and semantics                         |                                                                                                   | Computing in Civil Engineering                      |
| 49      | Yang Ji; André Borrmann; Jakob Beetz; and Mathias Obergrießer                                                                                                                                                                                                                                                                                                                                   | 2013 | Exchange of Parametric Bridge Models Using a Neutral Data Format                                     |                                                                                                   | Journal of Computing in Civil Engineering           |
| 50      | A. Borrmann*, T.H. Kolbe, A. Donaubaue, H. Steuer, J.R. Jubierre & M. Flurl                                                                                                                                                                                                                                                                                                                     | 2015 | Multi-Scale Geometric-Semantic Modeling of Shield Tunnels for GIS and BIM Applications               |                                                                                                   | Computer-Aided Civil and Infrastructure Engineering |
| 51      | Alex Bradley *, Haijiang Li, Robert Lark, Simon Dunn                                                                                                                                                                                                                                                                                                                                            | 2016 | BIM for infrastructure: An overall review and constructor perspective                                |                                                                                                   | Automation in Construction                          |
| 52      | Martin Breunig , André Borrmann, Ernst Rank, Stefan Hinz , Thomas Kolbe , Matthäus Schilcher , Ralf-Peter Mundani, Javier Ramos Jubierre, Matthias Flurl, Andreas Thomsen, Andreas Donaubaue , Yang Ji c, Steffen Urbanb, Simon Laun a, Simon Vilgertshofer d, Bruno Willenborg e, athias Menninghaus a, Horst Steuer e, Sven Wursthornb, Jens Leitloffb, Mulhim Al-Doorif, Nima Mazroobsemnani | 2017 | Collaborative multi-scale 3d city and infrastructure modeling and simulation                         | The International Archives of the Photogrammetry, Remote Sensing and Spatial Information Sciences |                                                     |
| 53      | Heng Li a, Neo K.Y. Chan a, Ting Huang a, Martin Skitmore b,*, Jay Yang b                                                                                                                                                                                                                                                                                                                       | 2012 | Virtual prototyping for planning bridge construction                                                 |                                                                                                   | Automation in Construction                          |
| 54      | S. DiBernardo                                                                                                                                                                                                                                                                                                                                                                                   | 2012 | Integrated Modeling Systems for Bridge Asset Management – Case Study                                 | Structures Congress                                                                               |                                                     |
| 55      | L.Y. Ding, Y. Zhou *, H.B. Luo, X.G. Wu                                                                                                                                                                                                                                                                                                                                                         | 2012 | Using nD technology to develop an integrated construction management system for                      |                                                                                                   | Automation in Construction                          |

| Ref No. | Author                                                                                                                                                             | Year | Title                                                                                                                                                             | Conference                                                                   | Journal                                             |
|---------|--------------------------------------------------------------------------------------------------------------------------------------------------------------------|------|-------------------------------------------------------------------------------------------------------------------------------------------------------------------|------------------------------------------------------------------------------|-----------------------------------------------------|
|         |                                                                                                                                                                    |      | city rail transit construction                                                                                                                                    |                                                                              |                                                     |
| 56      | Ge Gao <sup>1</sup> , Yu-Shen Liu <sup>2,*</sup> , Jia-Xing Wu <sup>3</sup> , Ming Gu <sup>4</sup> , Xu-Kun Yang <sup>5</sup> , and Hua-Liang Li <sup>6</sup>      | 2016 | IFC Railway: A Semantic and Geometric Modeling Approach for Railways based on IFC                                                                                 | International Conference on Computing in Civil and Building Engineering      |                                                     |
| 57      | Burcin Becerik-Gerber, A.M.ASCE <sup>1</sup> ; Farrokh Jazizadeh <sup>2</sup> ; Nan Li <sup>3</sup> ; and Gulben Calis <sup>4</sup>                                | 2012 | Application Areas and Data Requirements for BIM-Enabled Facilities Management                                                                                     |                                                                              | Journal of construction engineering and management  |
| 58      | Amin Hammad, Cheng Zhang & Yongxin Hu & Elaheh Mozaffari                                                                                                           | 2006 | Mobile Model-Based Bridge Lifecycle Management System                                                                                                             |                                                                              | Computer-Aided Civil and Infrastructure Engineering |
| 59      | Shih-Fang Huang; Chun-Sung Chen; and Ren-Jye Dzung                                                                                                                 | 2011 | Design of Track Alignment Using Building Information Modeling                                                                                                     |                                                                              | Journal of transportation engineering               |
| 60      | Seongwoon Jeong <sup>a</sup> , *, Rui Hou <sup>b</sup> , Jerome P. Lynch <sup>c</sup> , Hoon Sohn <sup>c</sup> , Kincho H. Law                                     | 2007 | An information modeling framework for bridge monitoring                                                                                                           |                                                                              | Advances in Engineering Software                    |
| 61      | Yang Ji, André Borrmann and Mathias Obergrießer                                                                                                                    | 2011 | Towards the Exchange of Parametric Bridge Models using a Neutral Data Format                                                                                      |                                                                              | Computing in Civil Engineering                      |
| 62      | Javier Ramos Jubierre, André Borrmann                                                                                                                              | 2015 | Knowledge-based engineering for infrastructure Facilities: assisted design of railway tunnels based On logic models and advanced procedural geometry Dependencies |                                                                              | Journal of Information Technology in Construction   |
| 63      | S. Gokhan Karaman, Stuart S. Chen, and Benny J. Ratnagaran                                                                                                         | 2013 | Three-Dimensional Parametric Data Exchange for Curved Steel Bridges                                                                                               |                                                                              | Transportation Research Record:                     |
| 64      | Hyunjoo Kim <sup>1</sup> ; Kevin Orr <sup>2</sup> ; Zhenhua Shen <sup>3</sup> ; Hyounseok Moon <sup>4</sup> ; Kibum Ju <sup>5</sup> ; and Wonsik Choi <sup>6</sup> | 2014 | Highway Alignment Construction Comparison Using Object-Oriented 3D Visualization Modeling                                                                         |                                                                              | J. Constr. Eng. Manage                              |
| 65      | M. M. Marzouk; and M. Hisham                                                                                                                                       | 2014 | Bridge Information Modeling in Sustainable Bridge Management                                                                                                      | International Conference on Sustainable Design and Construction (ICSDC) 2011 |                                                     |
| 66      | Christian Kocha, Andre Vonthron, Markus König                                                                                                                      | 2017 | A tunnel information modelling framework to support management, simulations and visualisations in mechanised tunnelling projects                                  |                                                                              | Automation in Construction                          |

| Ref No. | Author                                                             | Year | Title                                                                                                                                                             | Conference                                                                                                                                                                                    | Journal                                                |
|---------|--------------------------------------------------------------------|------|-------------------------------------------------------------------------------------------------------------------------------------------------------------------|-----------------------------------------------------------------------------------------------------------------------------------------------------------------------------------------------|--------------------------------------------------------|
| 67      | Naoki Kodama, Ray Fujita                                           | 2017 | Study of standard of LOD/LOI toward implementing CIM in Japan                                                                                                     | Proceedings of the 3rd International Conference on Civil and Building Engineering Informatics in conjunction with 2017 Conference on Computer Applications in Civil and Hydraulic Engineering |                                                        |
| 68      | Sahar Kurwil, Peter Demian and Tarek M. Hassan                     | 2017 | Integrating BIM and GIS in railway projects: A critical review                                                                                                    | Association of Researchers in Construction Management Conference                                                                                                                              |                                                        |
| 69      | S.H. Lee, B.G. Kim                                                 | 2011 | IFC Extension for Road Structures and Digital Modeling                                                                                                            | Procedia Engineering                                                                                                                                                                          |                                                        |
| 70      | S.-H. Lee, S. Park, J. Park, and K.W. Seo                          | 2014 | Open BIM-based Information Modeling of Railway Bridges and its Application Concept                                                                                | Computing in civil and building engineering at ACSE 2014                                                                                                                                      |                                                        |
| 71      | Xiaojun Li, Xiaodong Lin, Hehua Zhu, Xiuzhi Wang and Zhaoming Liu' | 2016 | A BIM/ GIS-based management and analysis system for shield tunnel in operation                                                                                    | Proceedings of International Conference on Computing in Civil and Building Engineering                                                                                                        |                                                        |
| 72      | Katherine A. Liapi                                                 | 2003 | 4D Visualization of Highway Construction Projects                                                                                                                 | Proceedings of the Seventh International Conference on Information Visualization                                                                                                              |                                                        |
| 73      | Nizar Markiz ↑, Ahmad Jrade                                        | 2014 | Integrating a fuzzy-logic decision support system with bridge information modelling and cost estimation at conceptual design stage of concrete box-girder bridges |                                                                                                                                                                                               | International Journal of Sustainable Built Environment |
| 74      | Mohamed Marzouk, Mohamed Hisham, Sabri Ismail, Mohamed Youssef     | 2010 | On the use of building information modeling in infrastructure bridges                                                                                             | 27th International Conference- Applications of IT in the AEC Industry                                                                                                                         |                                                        |
| 75      | Mohamed MARZOUK and Ahmed ABDEL ATY                                | 2012 | Maintaining Subways Infrastructures using BIM                                                                                                                     | Construction Research Congress 2012                                                                                                                                                           |                                                        |
| 76      | Mohamed Marzouk and Mohamed Hisham                                 | 2014 | Implementing Earned Value Management using                                                                                                                        |                                                                                                                                                                                               | KSCE Journal of Civil Engineering                      |

| Ref No. | Author                                                                                            | Year | Title                                                                                                                          | Conference                                                                                        | Journal                    |
|---------|---------------------------------------------------------------------------------------------------|------|--------------------------------------------------------------------------------------------------------------------------------|---------------------------------------------------------------------------------------------------|----------------------------|
|         |                                                                                                   |      | Bridge Information Modeling                                                                                                    |                                                                                                   |                            |
| 77      | Petr Matějka                                                                                      | 2016 | The importance of a transport infrastructure construction for the implementation of BIM                                        | International Scientific Conference People, Buildings and Environment 2014                        |                            |
| 78      | Mohammed Mawlana, Faridaddin Vahdatikhaki, Ahmad Doriani, Amin Hammad                             | 2015 | Integrating 4D modeling and discrete event simulation for phasing evaluation of elevated urban highway reconstruction projects |                                                                                                   | Automation in Construction |
| 79      | Alcí'nia Zita Sampaio                                                                             | 2003 | Geometric modeling of box girder deck for integrated bridge graphical system                                                   |                                                                                                   | Automation in Construction |
| 80      | Adriana X. Sanchez1*, Judy A. Kraatz2, Keith D. Hampson1, and Sudharsanan Loganathan3             | 2014 | BIM for Sustainable Whole-of-life Transport Infrastructure Asset Management                                                    | Proceedings of Sustainability in Public Works Conference                                          |                            |
| 81      | Bharathwaj Sankaran 1, Jojo France-Mensah 2 and William J. O'Brien3                               | 2016 | Data Integration Challenges for CIM in Large Infrastructure: A Case Study of Dallas Horseshoe Project                          | International Conference on Computing in Civil and Building Engineering (ICCCBE 2016)             |                            |
| 82      | Nader M. Okasha, Dan M. Frangopol *                                                               | 2011 | Computational platform for the integrated life-cycle management of highway bridges                                             |                                                                                                   | Engineering Structures     |
| 83      | CS Shim1a, NR Yun2, HH Song3                                                                      | 2011 | Application of 3D Bridge Information Modeling to Design and Construction of Bridges                                            | The Twelfth East Asia-Pacific Conference on Structural Engineering and Construction               |                            |
| 84      | ARUN M. SHIROLÉ, STUART S. CHEN & JAY A. PUCKETT                                                  | 2008 | Bridge Information Modeling for the Life Cycle Progress and Challenges                                                         | Transportation Research Circular E-C128: International Bridge and Structure Management Conference |                            |
| 85      | Yutaka Sugita1, Tatsuya Kawaguchi2, Koichiro Hatanaka3, Hiroshi Shimbo4, Masato Yamamura5, Yuichi | 2016 | Development of a design support system for geological disposal using a CIM concept                                             | International Conference on Computing in Civil and Building Engineering                           |                            |
| 86      | Yu-Chi Sung1, Chun-Chung Chen2*, Kuo-Chun Chang3                                                  | 2016 | Extended Bridge Inspection Module of a Life-cycle Based Bridge Management System                                               | International Conference on Computing in Civil and Building Engineering                           |                            |

| Ref No. | Author                                                                                                                                                         | Year | Title                                                                                                                                | Conference                                                                                                                                           | Journal                                                       |
|---------|----------------------------------------------------------------------------------------------------------------------------------------------------------------|------|--------------------------------------------------------------------------------------------------------------------------------------|------------------------------------------------------------------------------------------------------------------------------------------------------|---------------------------------------------------------------|
| 87      | Fumiki Tanaka <sup>1</sup> ,<br>Masato Hori <sup>2</sup> ,<br>Masahiko Onosato <sup>3</sup> ,<br>Hiroaki Date <sup>4</sup> , and<br>Satoshi Kanai <sup>5</sup> | 2016 | Bridge Information Model<br>Based on IFC Standards<br>and Web Content<br>Providing<br>System for Supporting an<br>Inspection Process | International<br>Conference on<br>Computing in<br>Civil and Building<br>Engineering                                                                  |                                                               |
| 88      | Liam R. Tawelian <sup>1</sup> ,<br>Slobodan B.<br>Mickovski <sup>1</sup>                                                                                       | 2016 | The Implementation of<br>Geotechnical Data Into the<br>BIM Process                                                                   | Procedia<br>Engineering                                                                                                                              |                                                               |
| 89      | Simon Vilgertshofer,<br>André Borrmann                                                                                                                         | 2017 | Using graph rewriting<br>methods for the semi-<br>automatic generation of<br>parametric infrastructure<br>models                     |                                                                                                                                                      | Advanced Engineering Informatics                              |
| 90      | Jiang Xu                                                                                                                                                       | 2017 | Research on Application<br>of BIM 5D Technology in<br>Central<br>Grand Project                                                       | Procedia<br>Engineering                                                                                                                              |                                                               |
| 91      | Nobuyoshi Yabuki,<br>Takashi Aruga,<br>Hiroshi Furuya                                                                                                          | 2013 | Development and<br>application of a product<br>model for shield tunnels                                                              | ISARC                                                                                                                                                |                                                               |
| 92      | Nobuyoshi Yabuki                                                                                                                                               | 2016 | Current status of civil<br>construction information<br>modeling initiative and<br>projects in Japan                                  | Civil Engineering<br>Conference in the<br>Asian Region                                                                                               |                                                               |
| 93      | Josef Zak <sup>1</sup> and Helen<br>Macadam <sup>2</sup>                                                                                                       | 2017 | Utilization of building<br>information modeling in<br>infrastructure's design and<br>construction                                    | IOP Conf. Series:<br>Materials Science<br>and Engineering                                                                                            |                                                               |
| 94      | Yang Zou and Shuixing<br>Zhou                                                                                                                                  | 2014 | A Model-based BIM<br>Framework for Bridge<br>Engineering                                                                             |                                                                                                                                                      | Applied Mechanics and Materials                               |
| 95      | Christopher James<br>Roberts, Erika Anneli<br>Pärn, David John<br>Edwards, Clinton<br>Aigbavboa                                                                | 2018 | Digitalising asset<br>management: concomitant<br>benefits and persistent<br>challenges                                               |                                                                                                                                                      | International Journal of Building<br>Pathology and Adaptation |
| 96      | Love, Peter ED, and<br>Jane Matthews                                                                                                                           | 2019 | The 'how' of benefits<br>management for digital<br>technology: From<br>engineering to asset<br>management                            |                                                                                                                                                      | Automation in Construction                                    |
| 97      | Belmont, Dan, Kevin<br>Hade, and Kojo Sefah                                                                                                                    | 2020 | Digital Asset Performance<br>Management—Taking<br>Utility Asset Management<br>to the Next Level                                      |                                                                                                                                                      | Climate and Energy                                            |
| 98      | Munir, Mustapha,<br>Arto Kiviniemi, and<br>Stephen W. Jones                                                                                                    | 2020 | Business value of<br>integrated BIM-based<br>asset management                                                                        |                                                                                                                                                      | Engineering, Construction and<br>Architectural Management     |
| 99      | Salem, O., Samuel,<br>I. J., & He, S                                                                                                                           | 2020 | BIM and VR/AR<br>technologies: from project<br>development to lifecycle<br>asset management                                          | Proceedings of<br>International<br>Structural<br>Engineering and<br>Construction<br>Holistic Overview<br>of Structural<br>Design and<br>Construction |                                                               |

| Ref No. | Author                                                                                                                                    | Year | Title                                                                                  | Conference                                                                          | Journal                               |
|---------|-------------------------------------------------------------------------------------------------------------------------------------------|------|----------------------------------------------------------------------------------------|-------------------------------------------------------------------------------------|---------------------------------------|
| 100     | Huang, J., Gheorghe, A., Handley, H., Pazos, P., Pinto, A., Kovacic, S., Collins, A., Keating, C., Sousa-Poza, A., Rabadi, G. and Unal, R | 2020 | Towards Digital Engineering -- The Advent of Digital Systems Engineering               |                                                                                     | Int. J. System of Systems Engineering |
| 101     | Lu, Qiuchen, Xiang Xie, Ajith Kumar Parlikad, Jennifer Mary Schooling, and Eirini Konstantinou                                            | 2020 | Moving from building information models to digital twins for operation and maintenance | Proceedings of Institution of Civil Engineers-Smart Infrastructure and Construction |                                       |
